# Supplementary material for: Process evaluation of the scale-up of integrated diabetes and hypertension care in Belgium, Cambodia and Slovenia (the SCUBY Project): a study protocol
Source: PubMed Central journal article supplement — BMJ Open. 2022 Dec 29;12(12):e062151. doi: 10.1136/bmjopen-2022-062151 (PMC9806029; doi:10.1136/bmjopen-2022-062151), 2022-12-29
Supplement: bmjopen-2022-062151supp001.pdf [file bmjopen-2022-062151supp001.pdf]

## Appendix 1: Three-dimensional scale-up framework

## Comprehensive scale-up

Types of strategy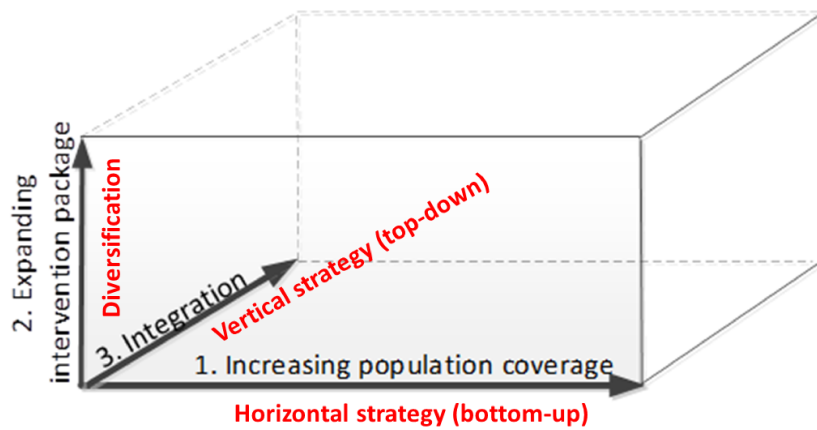

Adapted from: van Olmen J, Menon S, Poplas Susic A, et al. Scale-up integrated care for diabetes and hypertension in Cambodia, Slovenia and Belgium (SCUBY): a study design for a quasi-experimental multiple case study. *Global health action* 2020;13(1):1824382
