# Supplementary material for: Process evaluation of the scale-up of integrated diabetes and hypertension care in Belgium, Cambodia and Slovenia (the SCUBY Project): a study protocol
Source: PubMed Central journal article supplement — BMJ Open. 2022 Dec 29;12(12):e062151. doi: 10.1136/bmjopen-2022-062151 (PMC9806029; doi:10.1136/bmjopen-2022-062151), 2022-12-29
Supplement: bmjopen-2022-062151supp003.pdf [file bmjopen-2022-062151supp003.pdf]

### Appendix 3: Policy Dialogue Survey (tool 2)

#### INTRODUCTION:

**Thank you** for taking the time to provide your valuable feedback relating to the Policy Dialogue you recently attended in the context of the EU-funded SCUBY project (2019–2022), developing and implementing a scale-up roadmap for chronic diseases (specifically for diabetes type 2 and hypertension).

**To evaluate** the effectiveness and relevance of the Policy Dialogues and consultations with experts, we kindly ask for your assistance in completing this feedback survey. Your insights and comments will help shape and strengthen future Policy Dialogues. The data from this survey will be combined with information from other sources; this information can be used in reports, reports, conferences and publications in professional journals

The survey should take less than **5 minutes to complete**. Responding to the survey signifies your consent. You may opt not to answer or to skip questions; however, we will not be able to remove any information you have already provided should you opt to withdraw your participation thereafter. Your responses to this survey will be kept **confidential**.

#### SURVEY QUESTIONS:

Please provide us with the following information about yourself:

1. You are: [Drop down menu of **occupations**]

- a policy maker/politician
- a civil servant in public health administration or at the Ministry of Health
- a civil servant in social affairs or at the Ministry of Social Affairs
- a civil servant at health insurance institute or at the Ministry of Finance
- a professional medical association
- an association of social/informal care worker
- a patient organisation
- in academia
- an NGO
- an (international) donor organisation (funder)
- a healthcare worker (nurse, GP, specialist)
- a social worker
- an informal caregiver
- a patient

[listed occupations can be contextualised per country]

2. How would you rate each of the following?

*From 1-Poor to 5-Excellent*

1. The location of the Policy Dialogue
2. Technical conditions (material, etc.) for the Policy Dialogue

3. Moderation
4. Background information shared in preparation for the Policy Dialogue
5. Sufficiency of evidence provided and discussed in the Policy Dialogue
6. Relevance of the topics covered [high priority issue]
7. Achievement of goals as delineated in the agenda
8. Definition and agreement of outcomes and action plan to move forward

3. What is, in your opinion, the **most relevant topic, strategy or idea covered/shared** during this Policy Dialogue for you and your country and why?
4. Which topic is **your organisation** committed to (one that was mentioned in the Policy Dialogue meeting or not mentioned)?
5. Rate the discussed topics in relation to their **relevance and feasibility** (1=low relevance/feasibility; 10=high relevance/feasibility)

*Topics (strategies/roadmap elements) to be completed before/after policy dialogue by the country teams e.g. education; training; telemedicine as part of diabetes self-management; health financing (provider incentives); data monitoring; community involvement; primary care practice (integration) guidelines; etc.*

6. What do you see are the **primary enhancing factors (facilitators)** for the implementation and scale-up of discussed proposals/actions/strategies agreed in this Policy Dialogue in your National Policies?
7. What do you see are the **(financial/political/operational) barriers** for the implementation and scale-up of discussed proposals/actions/strategies agreed in this Policy Dialogue in your National Policies?
8. How has **COVID influenced the will to change/adapt/improve** towards better NCD/integrated care? How, positively? How, negatively?
9. In your opinion, what do you think worked well and what **could be improved from this meeting**?
10. Overall, how would you **rate this Policy Dialogue**?  
*From 1-Very Poor, to 10-Excellent*
11. Do you have any further comments or suggestions?

Thank you for taking the time to complete this survey. We truly value the information you have provided. Your responses will contribute to our analysis and help us to improve policy dialogues in the future.
