# Supplementary material for: Process evaluation of the scale-up of integrated diabetes and hypertension care in Belgium, Cambodia and Slovenia (the SCUBY Project): a study protocol
Source: PubMed Central journal article supplement — BMJ Open. 2022 Dec 29;12(12):e062151. doi: 10.1136/bmjopen-2022-062151 (PMC9806029; doi:10.1136/bmjopen-2022-062151), 2022-12-29
Supplement: bmjopen-2022-062151supp004.pdf [file bmjopen-2022-062151supp004.pdf]

## Appendix 4: Researcher Interview Guide (tool 3)

## Researcher interview guide

Interview participant(s):

Country:

Date:

Conducted by:

This guide is a complementary tool to the policy dialogue reporting form and aims to explore policy dialogue and roadmap-related indicators in more depth. Following items, based on implementation outcomes will be explored in depth:

- Adoption
- Stakeholders' support
- Implementation and scale-up dimensions
- Adaptation
- Policy dialogue environment-content-participants

**Interview questions****A. Questions about the Roadmap****1. Roadmap adoption:**

Is a roadmap activity/action/strategy adopted? Yes/no/N-A? Which?

Does this policy dialogue lead to the roadmap element envisaged?

Make reference to the adopted action points.

Can you elaborate on why/how it got adopted?

**2. Stakeholders' support:**

Which/how many roadmap elements were discussed?

Who were the key stakeholders that gave feedback/critiqued certain roadmap elements?

Who was in full support of the roadmap element(s)?

Fill in for each discussed (roadmap) element for each key participant from resource and/or implementing organisations:

5-point scale:

1. No support or buy-in
2. Little support or buy-in
3. Neutral (towards the specific action/roadmap element)
4. Initial or moderate support and buy-in
5. Full support

**3. Roadmap implementation:**

Is a roadmap activity/action/strategy realised (implemented)? Yes/no/N-A? Which?

Does this policy dialogue lead to the implementation of a roadmap element envisaged (phase after adoption)?

Make reference to successful action points.

|                                                                                                                                                                                                                                                                                                                                                                                                                                                                                                                                                                                                                                                                                                                      |
|----------------------------------------------------------------------------------------------------------------------------------------------------------------------------------------------------------------------------------------------------------------------------------------------------------------------------------------------------------------------------------------------------------------------------------------------------------------------------------------------------------------------------------------------------------------------------------------------------------------------------------------------------------------------------------------------------------------------|
| <p>Can you elaborate on why/how it got implemented?</p> <p>Have discussed proposals and solutions led to institutionalisation (already become part of the healthcare system)? Why and how? [scale-up dimension of integration]</p> <p>Have discussed proposals and solutions led to diversification, the expansion [scale-up dimension] of the ICP? Why and how?</p> <p>Have discussed proposals and solutions led to increased population or geographical coverage [scale-up dimension]? Why and how?</p> <p>What are sources of verification [for perceived scale-up dimensions]? Research findings? Organisational report? Database? News item? Word-of-mouth? From resource or implementing organisation(s)?</p> |
| <p><b>4. Adaptation/plasticity:</b></p> <p>Has the roadmap (or a certain activity) been adapted?</p> <p>Can you describe the way in which the roadmap (elements) have been adapted?</p> <p>Can you indicate how this (these) adaptation(s) came about or why it is (they are) appropriate.</p>                                                                                                                                                                                                                                                                                                                                                                                                                       |
| <p><b>5. Context/elasticity:</b></p> <p>How has the context evolved? How are contextual (political/financial/operational) barriers and facilitators to action plan/in roadmap evolving?</p>                                                                                                                                                                                                                                                                                                                                                                                                                                                                                                                          |
| <p><b>B. Questions about the previously organised Policy Dialogue(s)</b></p> <p><b>! : All questions need to be completed for big* policy dialogues (otherwise only questions 5–9 and 19, see green boxes)</b></p> <p><b>* when SCUBY is the organiser or when it is a multi-stakeholder dialogue</b></p>                                                                                                                                                                                                                                                                                                                                                                                                            |
| <p><i>Please briefly comment on following items within 'Theme – Environment':</i></p>                                                                                                                                                                                                                                                                                                                                                                                                                                                                                                                                                                                                                                |
| <p><b>1. Suitability of room/location:</b></p> <p>Was the room/location suitable? Why (not)?</p>                                                                                                                                                                                                                                                                                                                                                                                                                                                                                                                                                                                                                     |
| <p><b>2. Moderation/facilitation:</b></p> <p>How was the moderation? Why good/bad?</p>                                                                                                                                                                                                                                                                                                                                                                                                                                                                                                                                                                                                                               |
| <p><b>3. Technical (material) conditions:</b></p> <p>How were technical/material conditions? (e.g. website/video/presentation/flyers/information package/catering etc. provided?) Why good/bad?</p>                                                                                                                                                                                                                                                                                                                                                                                                                                                                                                                  |
| <p><b>4. Other conditions:</b></p>                                                                                                                                                                                                                                                                                                                                                                                                                                                                                                                                                                                                                                                                                   |
| <p><i>Please briefly comment on following items within 'Theme – Content':</i></p>                                                                                                                                                                                                                                                                                                                                                                                                                                                                                                                                                                                                                                    |
| <p><b>5. Was it a high-priority issue</b> (for dialogue participants)? Why?</p>                                                                                                                                                                                                                                                                                                                                                                                                                                                                                                                                                                                                                                      |
| <p><b>6. Were clear meeting objectives</b> set? Clear how? If unclear, why?</p>                                                                                                                                                                                                                                                                                                                                                                                                                                                                                                                                                                                                                                      |
| <p><b>7. Do you think that sufficient information was shared with participants</b> (in advance, during and after policy dialogue)? (Why not?)</p>                                                                                                                                                                                                                                                                                                                                                                                                                                                                                                                                                                    |
| <p><b>8. Was evidence used/presented</b> in the meeting?</p> <p>If so, what kind (quant/qual/both) and what evidence specifically?</p>                                                                                                                                                                                                                                                                                                                                                                                                                                                                                                                                                                               |
| <p><b>9. Was agreement reached on outcomes and action plan?</b> How/why not?</p>                                                                                                                                                                                                                                                                                                                                                                                                                                                                                                                                                                                                                                     |
| <p><b>10. Rules of engagement:</b></p> <p>Was there a formal or informal format?</p> <p>What was the set-up or rules?</p>                                                                                                                                                                                                                                                                                                                                                                                                                                                                                                                                                                                            |

|                                                                                                                                                                                                                                                                                                                                                                                                                                                                                                                                                                                                                                              |
|----------------------------------------------------------------------------------------------------------------------------------------------------------------------------------------------------------------------------------------------------------------------------------------------------------------------------------------------------------------------------------------------------------------------------------------------------------------------------------------------------------------------------------------------------------------------------------------------------------------------------------------------|
| <i>(e.g. online meeting, Chatham House rules, stakeholders share their perspectives one by one, scientific presentation with comments, discussion in sub-groups or plenary session, expert panel, high-level policy maker meeting)</i>                                                                                                                                                                                                                                                                                                                                                                                                       |
| <b>11. Was the policy dialogue well-prepared?</b>                                                                                                                                                                                                                                                                                                                                                                                                                                                                                                                                                                                            |
| <b>12. Was there proper follow-up</b> (on next actions, next meeting, evidence/information shared)?                                                                                                                                                                                                                                                                                                                                                                                                                                                                                                                                          |
| <i>Please briefly comment on following items within 'Theme – Participants':</i>                                                                                                                                                                                                                                                                                                                                                                                                                                                                                                                                                              |
| <b>13. Representation:</b><br>Which stakeholder groups were represented? Which were excluded?                                                                                                                                                                                                                                                                                                                                                                                                                                                                                                                                                |
| <b>14. Participation:</b><br>Was participation of stakeholders during the discussion equal?<br>Who participated more?<br>Who participated less?                                                                                                                                                                                                                                                                                                                                                                                                                                                                                              |
| <b>15. Collaboration</b><br>How was the collaboration between stakeholders?<br><ul style="list-style-type: none"> <li>- Very poor/poor/neutral/good/very good</li> <li>- Can you use a word to describe your collaboration? E.g. top-down, bottom-up, organic, spontaneous, awkward, formal, informal, ...</li> </ul> Why do you think it was good/bad?                                                                                                                                                                                                                                                                                      |
| <b>16. Consensus</b><br>Was consensus reached between stakeholders on a certain issue? How?                                                                                                                                                                                                                                                                                                                                                                                                                                                                                                                                                  |
| <b>17. Trust</b><br>Was there trust between stakeholders? How did you notice?                                                                                                                                                                                                                                                                                                                                                                                                                                                                                                                                                                |
| <b>18. Mutual respect</b><br>Was there mutual respect? How did you notice?                                                                                                                                                                                                                                                                                                                                                                                                                                                                                                                                                                   |
| <b>19. Will to implement of policy-makers and/or implementers* :</b><br>1) Was there will to implement a discussed strategy or action? If yes, which strategy and who showed this will to implement? What do you think drives them to implement? Why/what is the reason to implement? Is there one direct reason or many good reasons?<br>2) Specify type of political commitment (expressive/financial/institutional (i.e. policy))?<br>3) How has COVID influenced political will towards NCD/integrated care? How, positively? How, negatively?<br>* Question only relevant if resource or implementing organisation(s) are participating |
| <b>20. Leadership</b><br>Which stakeholder displayed most leadership? + Why?                                                                                                                                                                                                                                                                                                                                                                                                                                                                                                                                                                 |
| <b>21. Urgency</b><br>Which stakeholder displayed most urgency? + Why?                                                                                                                                                                                                                                                                                                                                                                                                                                                                                                                                                                       |
| <b>22. Legitimacy</b><br>Which stakeholder displayed most legitimacy? + Why?                                                                                                                                                                                                                                                                                                                                                                                                                                                                                                                                                                 |
| <b>23. Ownership</b><br>Which stakeholder had most ownership over the issue? + Why?                                                                                                                                                                                                                                                                                                                                                                                                                                                                                                                                                          |
