# Supplementary material for: Process evaluation of the scale-up of integrated diabetes and hypertension care in Belgium, Cambodia and Slovenia (the SCUBY Project): a study protocol
Source: PubMed Central journal article supplement — BMJ Open. 2022 Dec 29;12(12):e062151. doi: 10.1136/bmjopen-2022-062151 (PMC9806029; doi:10.1136/bmjopen-2022-062151), 2022-12-29

## Appendix 8: Flowchart depicting how data collection tools feed into different types of analyses

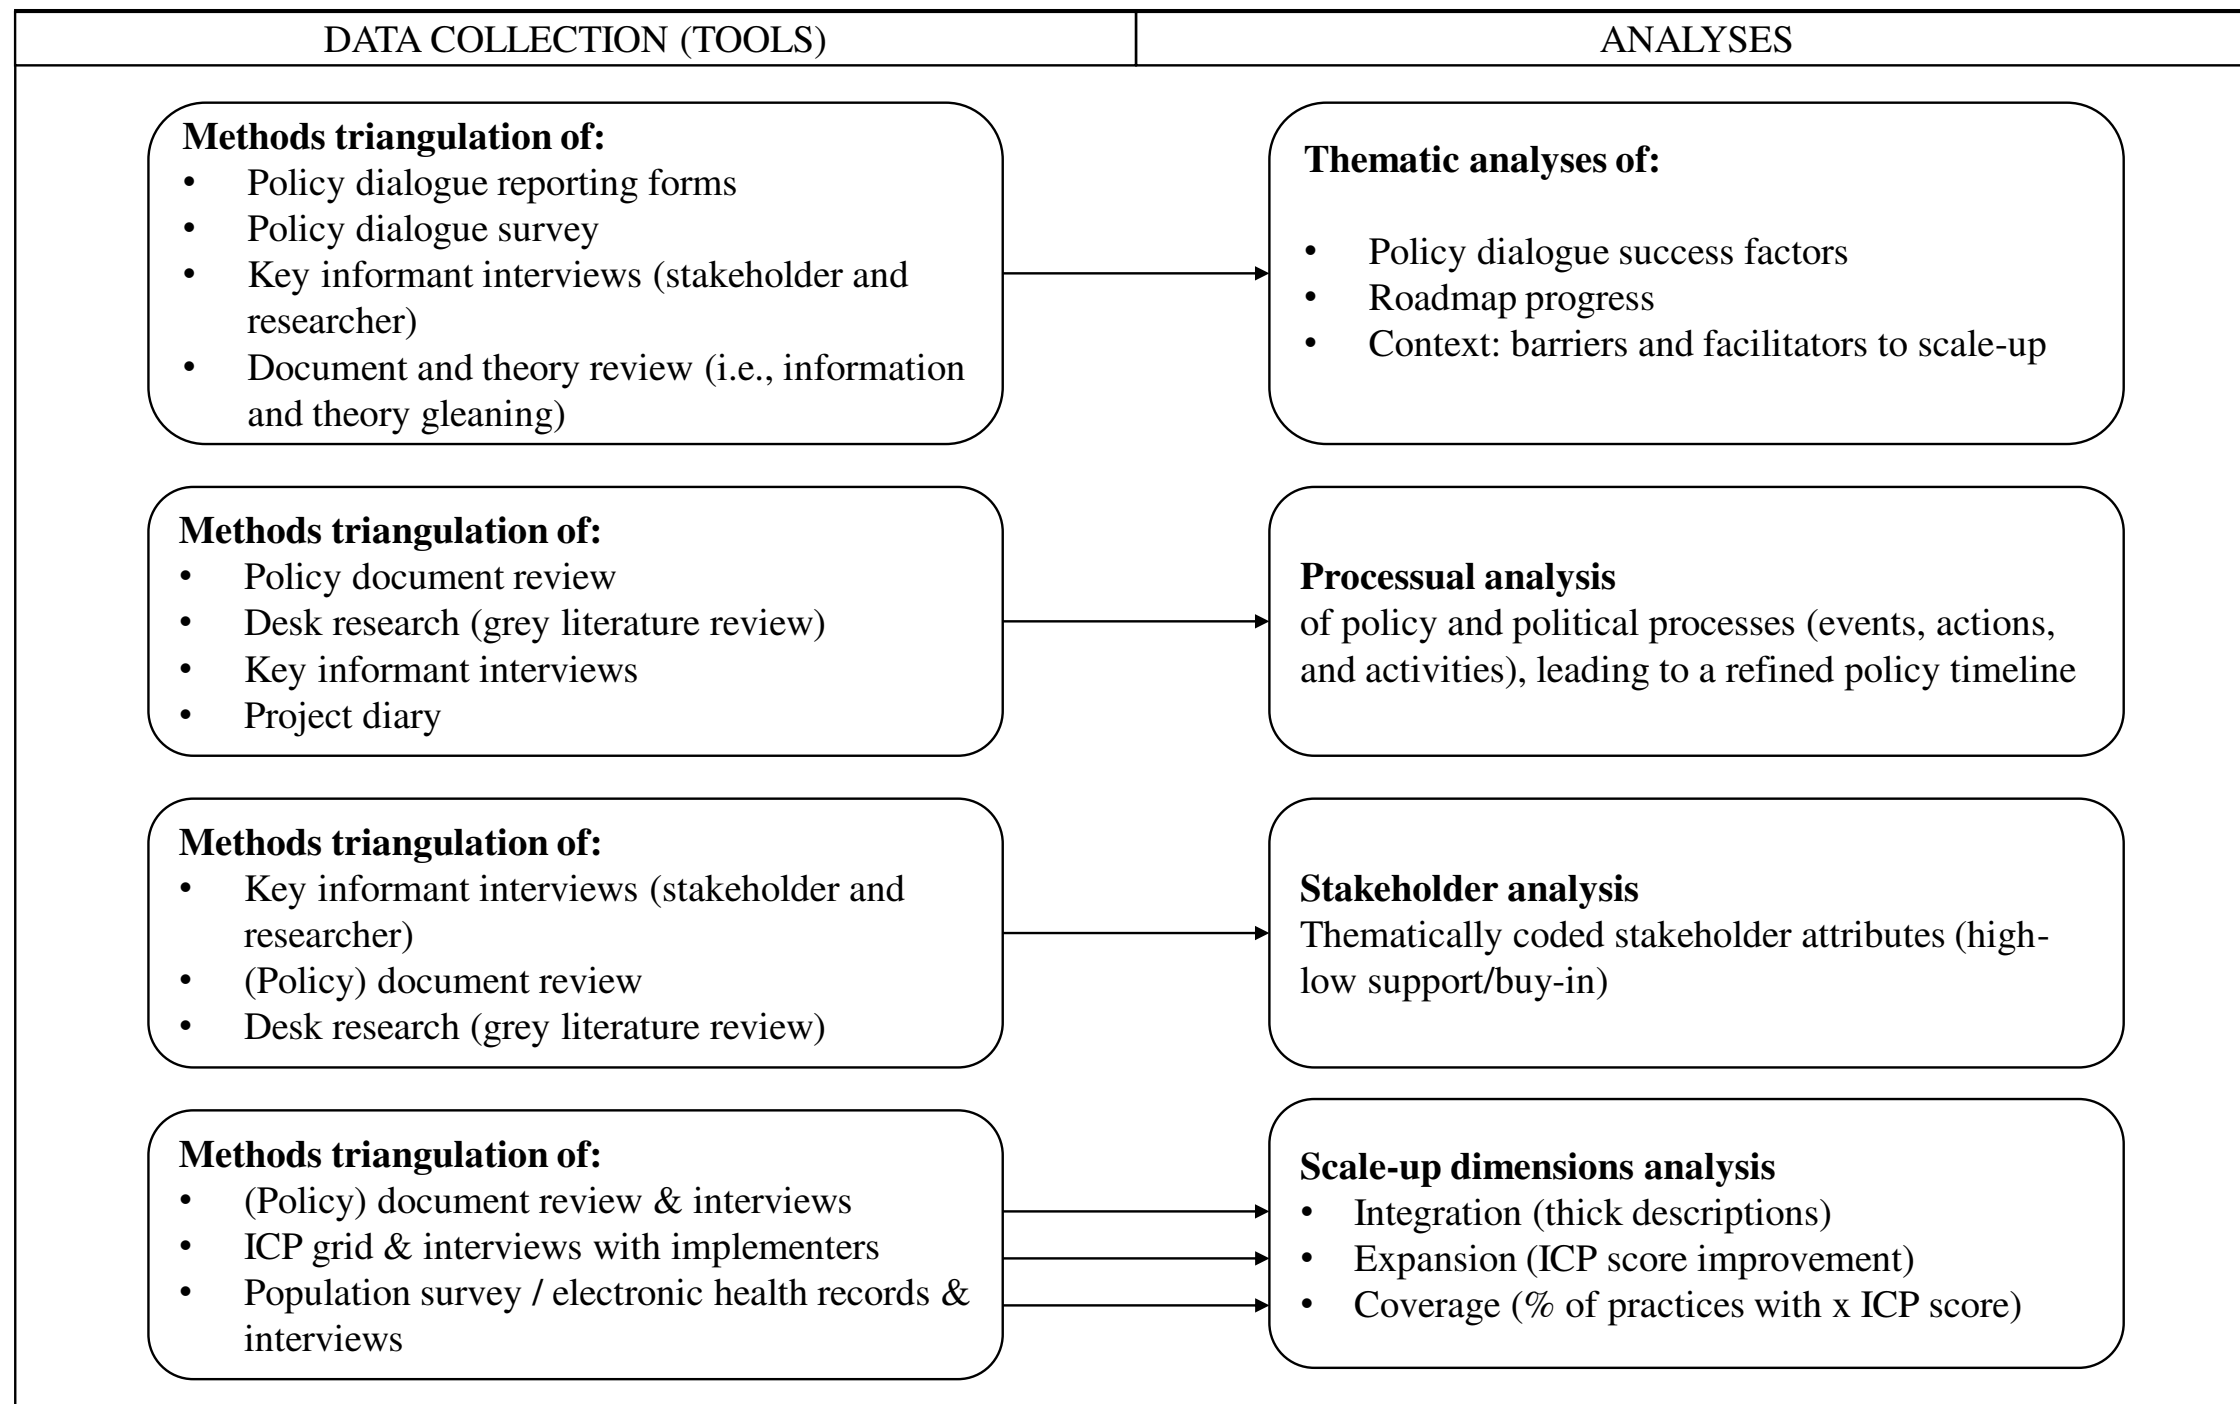

Supplement: bmjopen-2022-062151supp008.pdf [file bmjopen-2022-062151supp008.pdf]
